# Supplementary material
Source: PubMed Central journal article supplement (PMC11625470)
Supplement: NIHMS2026506-supplement-Supplementary_information.pdf [file NIHMS2026506-supplement-Supplementary_information.pdf]

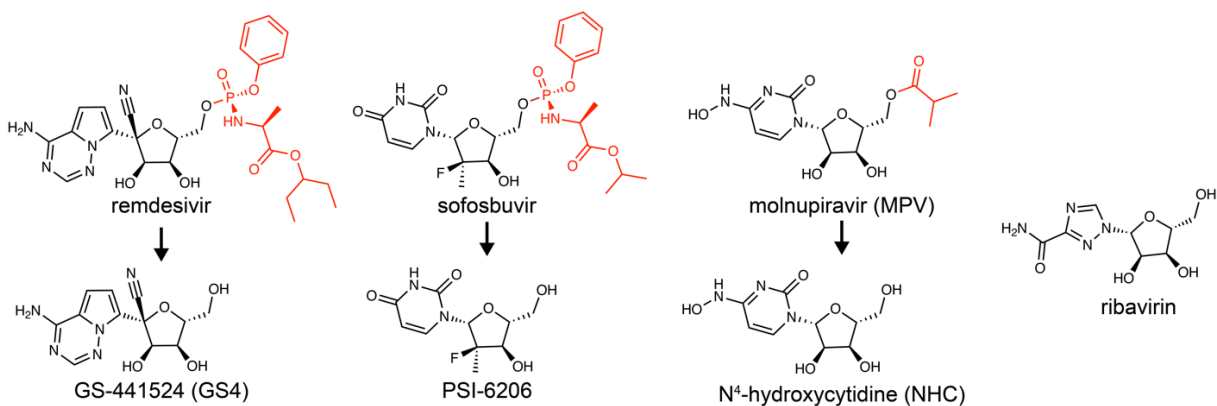

**Supplementary Figure 1 | Chemical structures of nucleoside-analogue antivirals and their prodrug precursors.**

Chemical structures of remdesivir, sofosbuvir, and molnupiravir, with their respective parent nucleosides (GS4, PSI-6206, and NHC) shown at bottom. 5' protecting groups depicted in red. Nucleoside analogue ribavirin shown at right.

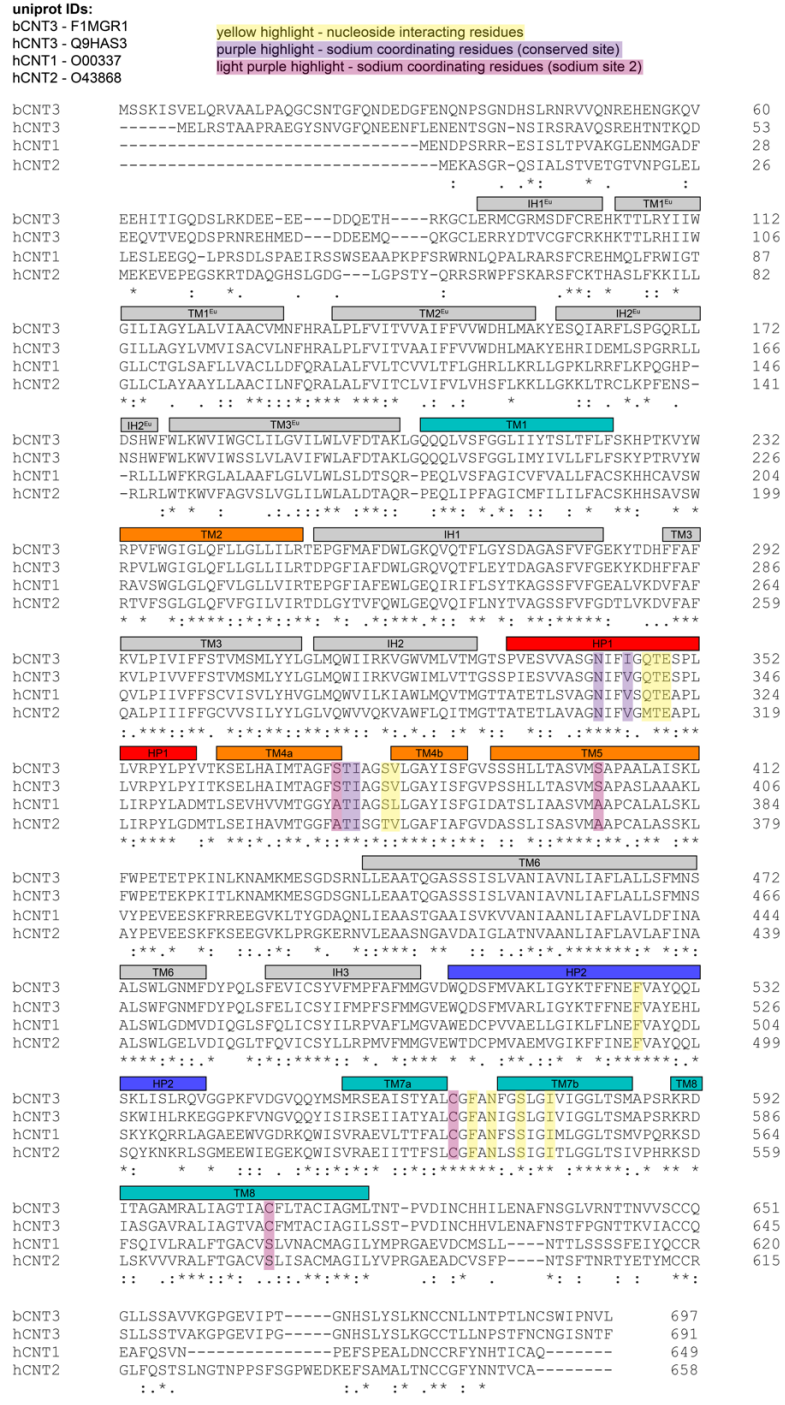

**Supplementary Figure 2 | Multiple sequence alignment of select concentrative nucleoside transporters.**

Multiple sequence alignment of *Bos taurus* CNT3 and human CNT isoforms 1-3. Residues involved in nucleoside coordination are highlighted in yellow; residues comprising the “conserved sodium site” (site 1) are highlighted in purple; residues comprising the “sodium site 2” are highlighted in light purple. Uniprot IDs associated with each sequence shown at top left.

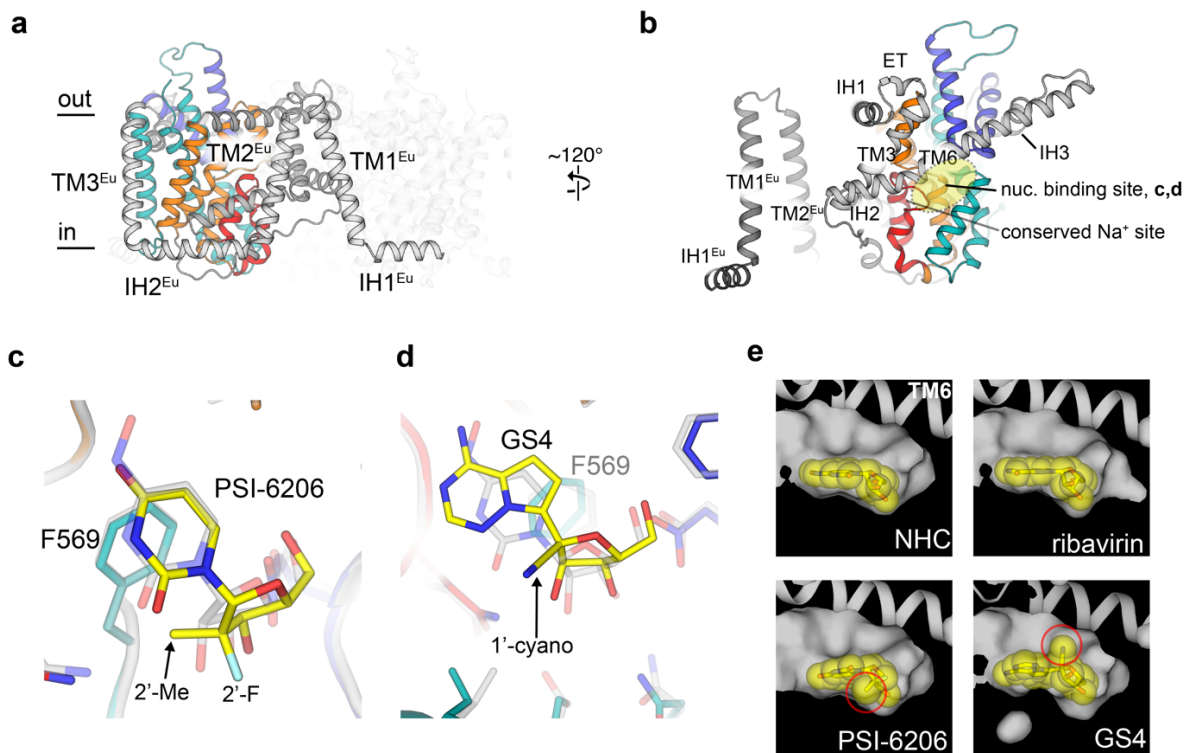

**Supplementary Figure 3 | Inward-facing bCNT3 in apo and antiviral drug bound states.**

**a**, Overall transporter architecture, with the eukaryotic scaffold domain emphasized. **b**, Overall architecture of the conserved CNT fold. **c**, Zoomed in view of the 2' position of ribose in the PSI-6206 structure, with the NHC structure superposed and shown in transparent grey for reference. **d**, Zoomed-in view of the 1' position of ribose in the GS4 structure, with the NHC structure superposed and shown in transparent grey for reference. **e**, Nucleoside binding pocket all four drug-bound structures, with bulky ribose substituents of PSI-6206 and GS4 circled. TM6 of the scaffold domain shown as cartoon for reference.

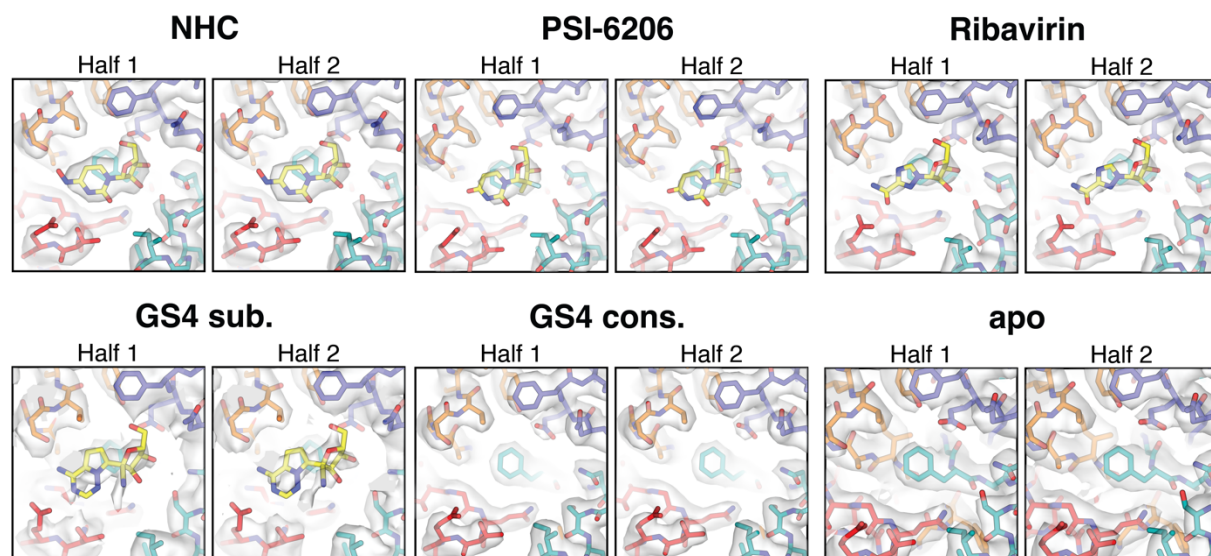

**Supplementary Figure 4 | Cryo-EM half maps for CNT3 substrate binding pocket.**

Local cryo-EM half map reconstructions for CNT3 substrate binding pocket. Cryo-EM densities are shown at map threshold values of  $6\sigma$  for NHC, PSI-6206, ribavirin, GS4 sub., apo, or  $7\sigma$  for GS4 cons.

bCNT3 ribavirin  
PDB ID: 8TZ1

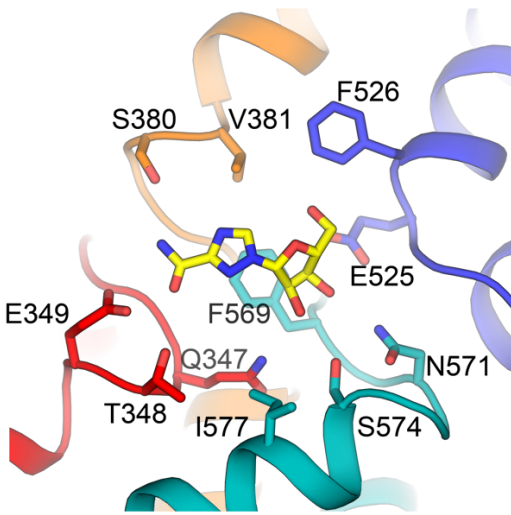

vcCNT ribavirin  
PDB ID: 4PB1

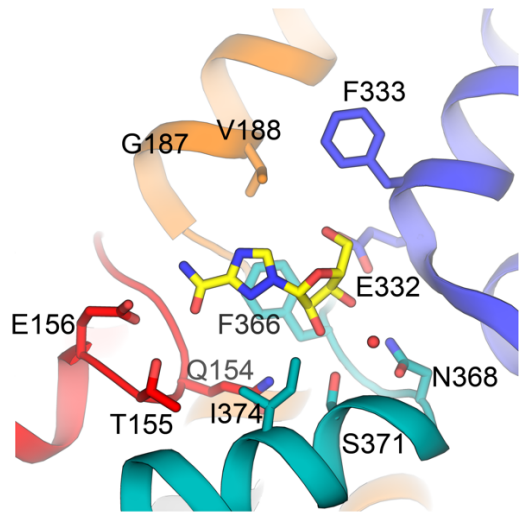

**Supplementary Figure 5 | Comparison of ribavirin bound to eukaryotic or bacterial CNT.**

Protein ligand interactions for ribavirin complexed to bCNT3 in the cryo-EM structure (left, this study) and ribavirin complexed to the bacterial CNT vcCNT in the X-ray crystal structure (right, previous study<sup>20</sup>).

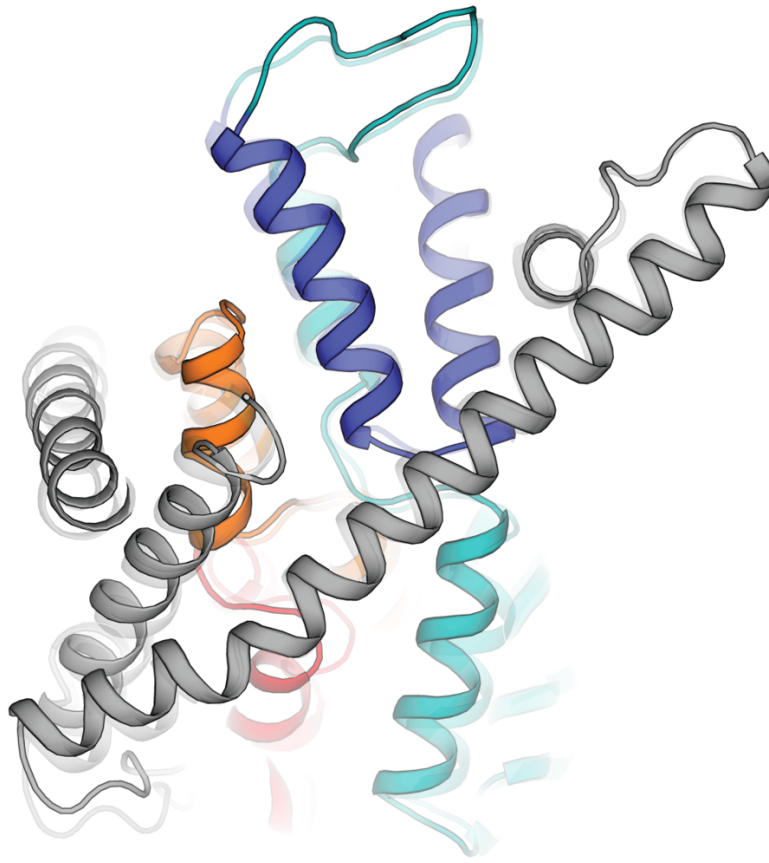

**Supplementary Figure 6 | MD transition of INT1 to IFS state.**

Final normal MD frame (500 ns) of NHC-bound INT1 structure (solid) overlaid with experimental IFS structure (transparent), showing final structural transition from INT1 to IFS states.

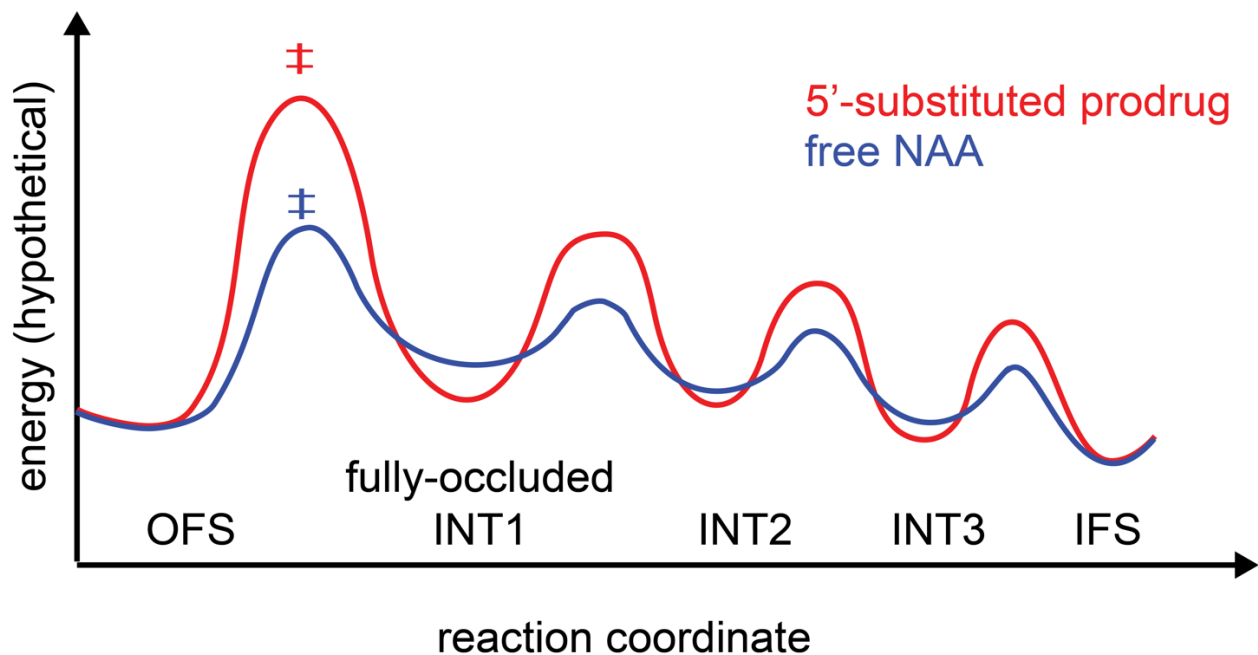

**Supplementary Figure 7 | Hypothetical energetic landscapes.**

Transition of elevator-type motion of CNT3 from OFS to IFS in the presence of free NAA or 5'-substituted prodrug. 5'-substituted prodrug may elevate the energetic barrier between the states or stabilize individual states. The isomerization from OFS to INT1 likely represents the highest energy barrier during translocation (transition state of this conversion denoted with ‡).

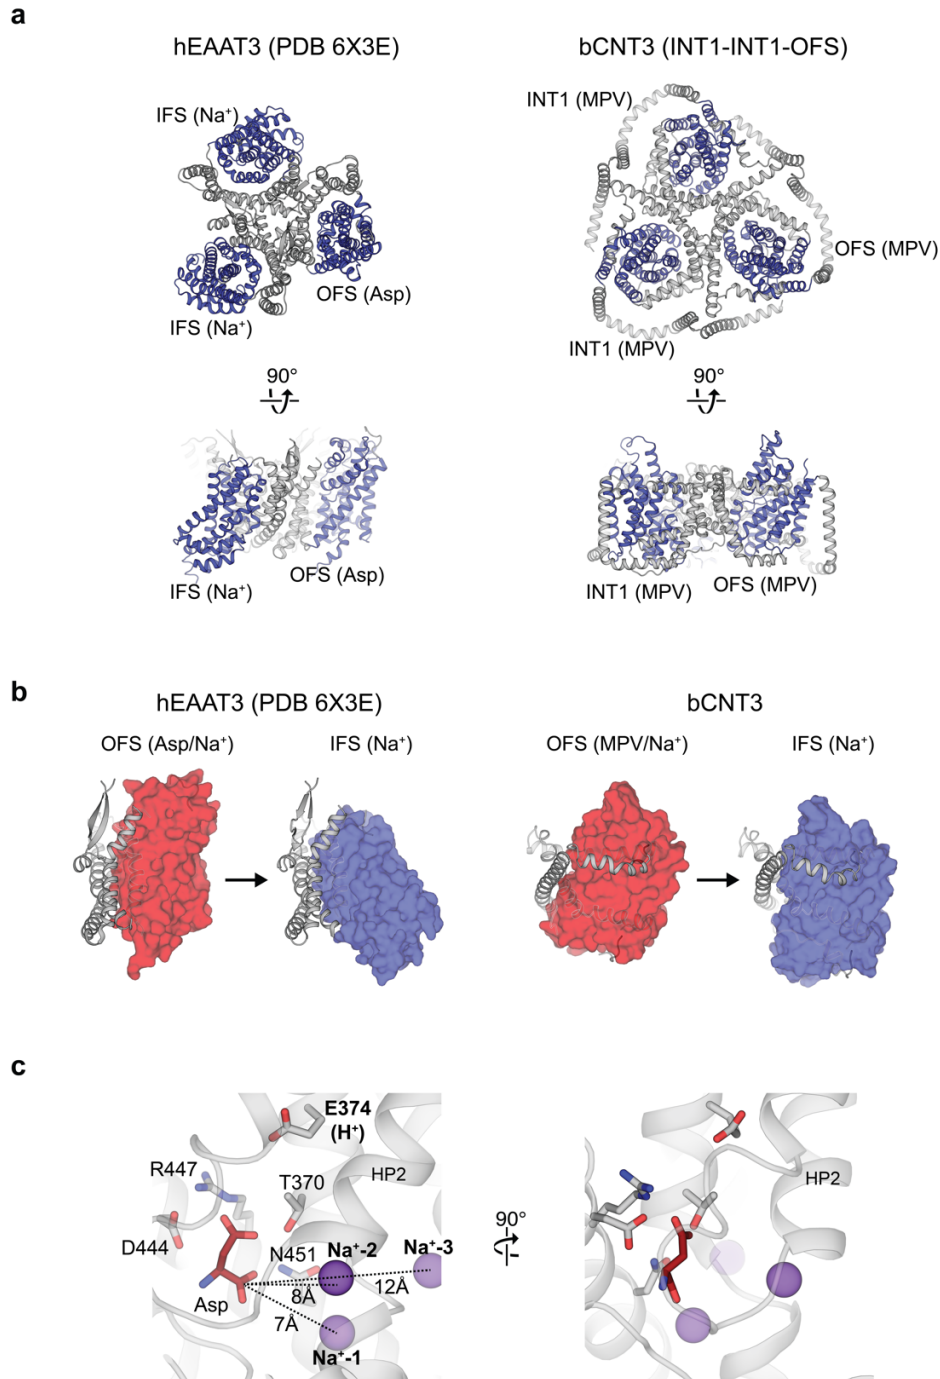

**Supplementary Figure 8 | Comparison of bCNT3 with representative SLC1 member hEAAT3.**

**a**, Top-down and side view of IFS-IFS-OFS hEAAT3 (previous study<sup>44</sup>; PDB 6X3E) and INT1-INT1-OFS bCNT3 (this study; PDB 8TZD). Transport domain colored in blue, scaffold domain colored in grey. **b**, Comparison of the transport domain movements between the two end states (OFS and IFS) in SLC1 and SLC28. Transport domain depicted as colored surface (red – OFS, blue – IFS) and scaffold domain colored in grey. **c**, The arrangement of substrate and co-transported ions in the hEAAT3 substrate binding pocket.



|                                                  | apo<br>(EMD-41731)<br>(PDB 8TZ2) | NHC<br>(EMD-41734)<br>(PDB 8TZ5) | PSI-6206<br>(EMD-41735)<br>(PDB 8TZ6) | ribavirin<br>(EMD-41730)<br>(PDB 8TZ1) | GS4 cons.<br>(EMD-41732)<br>(PDB 8TZ3) | GS4 sub.<br>(EMD-41733)<br>(PDB 8TZ4) |
|--------------------------------------------------|----------------------------------|----------------------------------|---------------------------------------|----------------------------------------|----------------------------------------|---------------------------------------|
| <b>Data collection and processing</b>            | <b>dataset: GS-441524</b>        |                                  |                                       |                                        |                                        |                                       |
| Magnification                                    | 81,000                           | 81,000                           | 81,000                                | 81,000                                 | 81,000                                 | 81,000                                |
| Voltage (kV)                                     | 300                              | 300                              | 300                                   | 300                                    | 300                                    | 300                                   |
| Electron exposure (e-/Å <sup>2</sup> )           | 60                               | 60                               | 60                                    | 60                                     | 50                                     | 50                                    |
| Defocus range (µm)                               | -0.8 to -1.8                     | -1.0 to -2.25                    | -0.8 to -1.8                          | -0.8 to -1.8                           | -1.0 to -2.0                           | -1.0 to -2.0                          |
| Pixel size (Å)                                   | 1.08                             | 1.12                             | 1.08                                  | 1.08                                   | 1.08                                   | 1.08                                  |
| Symmetry imposed                                 | C3                               | C3                               | C3                                    | C3                                     | C3                                     | C1                                    |
| Initial particle images (no.)                    | 2,186,756                        | 1,687,435                        | 2,827,294                             | 2,714,156                              | 3,586,285                              | 3,586,285                             |
| Final particle images (no.)                      | 102,248                          | 147,332                          | 199,596                               | 247,980                                | 498,109                                | 38,774                                |
| Map resolution (Å)                               | 2.80                             | 2.74                             | 2.69                                  | 2.54                                   | 2.31                                   | 3.23                                  |
| (FSC threshold=0.143)                            |                                  |                                  |                                       |                                        |                                        |                                       |
| <b>Refinement</b>                                |                                  |                                  |                                       |                                        |                                        |                                       |
| Initial model used                               | GS4 cons.                        | GS4 cons.                        | GS4 cons.                             | GS4 cons.                              | PDB:3TIJ                               | GS4 cons.                             |
| Map sharpening <i>B</i> factor (Å <sup>2</sup> ) | 100.2                            | 104.9                            | 96.0                                  | 50.0                                   | 89.8                                   | 86.2                                  |
| Model composition                                |                                  |                                  |                                       |                                        |                                        |                                       |
| Non-hydrogen atoms                               | 24,828                           | 25,395                           | 25,398                                | 25,398                                 | 25,320                                 | 24,4421                               |
| Protein residues                                 | 1,599                            | 1,599                            | 1,599                                 | 1,599                                  | 1,599                                  | 1,599                                 |
| Ligands                                          | LBN: 6, NA: 6                    | NA:3, U56:3,<br>LBN: 12          | NA:3, U7I:3,<br>LBN:12                | NA:6, RBV:3,<br>LBN:12                 | NA:6, LBN:12                           | U08:1                                 |
| <i>B</i> factors (Å <sup>2</sup> )               |                                  |                                  |                                       |                                        |                                        |                                       |
| Protein                                          | 41.70                            | 48.37                            | 56.17                                 | 86.33                                  | 36.60                                  | 63.19                                 |
| Ligand                                           | 43.04                            | 52.26                            | 56.23                                 | 87.10                                  | 37.21                                  | 44.46                                 |
| R.m.s. deviations                                |                                  |                                  |                                       |                                        |                                        |                                       |
| Bond lengths (Å)                                 | 0.004                            | 0.002                            | 0.004                                 | 0.003                                  | 0.008                                  | 0.002                                 |
| Bond angles (°)                                  | 0.551                            | 0.440                            | 0.511                                 | 0.465                                  | 0.681                                  | 0.407                                 |
| Validation                                       |                                  |                                  |                                       |                                        |                                        |                                       |
| MolProbity score                                 | 0.95                             | 0.94                             | 1.02                                  | 0.89                                   | 1.13                                   | 0.96                                  |
| Clashscore                                       | 1.90                             | 1.44                             | 2.35                                  | 1.48                                   | 1.92                                   | 1.96                                  |
| Poor rotamers (%)                                | 0.00                             | 0.24                             | 0.48                                  | 0.48                                   | 0.00                                   | 0.00                                  |
| Ramachandran plot                                |                                  |                                  |                                       |                                        |                                        |                                       |
| Favored (%)                                      | 98.87                            | 97.74                            | 98.12                                 | 99.06                                  | 96.99                                  | 99.12                                 |
| Allowed (%)                                      | 1.13                             | 2.26                             | 1.88                                  | 0.94                                   | 2.82                                   | 0.88                                  |
| Disallowed (%)                                   | 0.00                             | 0.00                             | 0.00                                  | 0.00                                   | 0.19                                   | 0.00                                  |

**Supplementary Table 1 | Cryo-EM data collection, refinement, and validation statistics (part 1)**

|         | apo | NHC           | PSI           | Rib           | GS4 Sub       |
|---------|-----|---------------|---------------|---------------|---------------|
| apo     | -   | 0.123         | 0.1072        | 0.1070        | 0.1138        |
| NHC     |     | <b>0.8317</b> |               |               |               |
| PSI     |     |               | <b>0.7903</b> |               |               |
| Rib     |     |               |               | <b>0.8663</b> |               |
| GS4 sub |     |               |               |               | <b>0.7106</b> |

**Supplementary Table 2 | Local pairwise cross correlation values for apo and liganded structures.**

Map-to-map cross-correlation values for liganded structure-liganded map (self-correlation) and liganded structures against apo map. The cross-correlation values are calculated using Chimera by generating a map from PDB coordinates using only respective ligands followed by cross correlation calculation of the generated ligand map against experimental map.

|                                                  | INT1-INT1-OFS<br>(EMD-41755)<br>(PDB 8TZD) | INT1 (C3)<br>(EMD-41736)<br>(PDB 8TZ7) | INT1-INT1-INT3<br>(EMD-41737)<br>(PDB 8TZ8) | INT2 (C3)<br>(EMD-41738)<br>(PDB 8TZ9) | INT1-INT1-INT2<br>(EMD-41739)<br>(PDB 8TZA) |
|--------------------------------------------------|--------------------------------------------|----------------------------------------|---------------------------------------------|----------------------------------------|---------------------------------------------|
| <b>Data collection and processing</b>            | <b>dataset: MPV condition 1</b>            |                                        |                                             | <b>dataset: MPV condition 2</b>        |                                             |
| Magnification                                    |                                            | 81,000                                 |                                             | 81,000                                 |                                             |
| Voltage (kV)                                     |                                            | 300                                    |                                             | 300                                    |                                             |
| Electron exposure (e-/Å <sup>2</sup> )           |                                            | 60                                     |                                             | 60                                     |                                             |
| Defocus range (µm)                               |                                            | -0.8 to -1.8                           |                                             | -0.8 to -1.8                           |                                             |
| Pixel size (Å)                                   |                                            | 1.08                                   |                                             | 1.08                                   |                                             |
| Symmetry imposed                                 | C1                                         | C3                                     | C1                                          | C3                                     | C1                                          |
| Initial particle images (no.)                    |                                            | 2,592,142                              |                                             | 2,026,720                              |                                             |
| Final particle images (no.)                      | 118,133                                    | 127,798                                | 109,039                                     | 4,412                                  | 15,400                                      |
| Map resolution (Å)<br>(FSC threshold=0.143)      | 3.20                                       | 3.00                                   | 3.19                                        | 3.67                                   | 3.43                                        |
| <b>Refinement</b>                                |                                            |                                        |                                             |                                        |                                             |
| Initial model used                               | GS4 cons.                                  | GS4 cons.                              | GS4 cons.                                   | GS4 cons.                              | GS4 cons.                                   |
| Map sharpening <i>B</i> factor (Å <sup>2</sup> ) | 98.0                                       | 113.0                                  | 95.7                                        | 59.5                                   | 63.0                                        |
| Model composition                                |                                            |                                        |                                             |                                        |                                             |
| Non-hydrogen atoms                               | 24,197                                     | 24,615                                 | 24,586                                      | 24,354                                 | 24,354                                      |
| Protein residues                                 | 1,587                                      | 1,599                                  | 1,599                                       | 1,599                                  | 1,599                                       |
| Ligands                                          | XMO:3, LBN:1                               | XMO:3, LBN:3                           | XMO:3, LBN:2                                | XMO:3                                  | XMO:3                                       |
| <i>B</i> factors (Å <sup>2</sup> )               |                                            |                                        |                                             |                                        |                                             |
| Protein                                          | 39.63                                      | 57.48                                  | 60.42                                       | 89.01                                  | 60.33                                       |
| Ligand                                           | 27.52                                      | 60.04                                  | 58.09                                       | 69.19                                  | 44.47                                       |
| R.m.s. deviations                                |                                            |                                        |                                             |                                        |                                             |
| Bond lengths (Å)                                 | 0.004                                      | 0.003                                  | 0.004                                       | 0.003                                  | 0.002                                       |
| Bond angles (°)                                  | 0.932                                      | 0.465                                  | 0.494                                       | 0.551                                  | 0.445                                       |
| Validation                                       |                                            |                                        |                                             |                                        |                                             |
| MolProbity score                                 | 1.24                                       | 1.01                                   | 1.19                                        | 1.17                                   | 1.04                                        |
| Clashscore                                       | 4.72                                       | 2.29                                   | 4.00                                        | 3.87                                   | 2.55                                        |
| Poor rotamers (%)                                | 0.16                                       | 0.24                                   | 0.00                                        | 0.72                                   | 0.00                                        |
| Ramachandran plot                                |                                            |                                        |                                             |                                        |                                             |
| Favored (%)                                      | 98.23                                      | 98.31                                  | 98.31                                       | 98.31                                  | 99.00                                       |
| Allowed (%)                                      | 1.77                                       | 1.69                                   | 1.69                                        | 1.69                                   | 1.00                                        |
| Disallowed (%)                                   | 0.00                                       | 0.00                                   | 0.00                                        | 0.00                                   | 0.00                                        |

**Supplementary Table 3 | Cryo-EM data collection, refinement, and validation statistics (part 2)**

| System Name | # of atoms | Replicas | # of Ions (Na <sup>+</sup> /Cl <sup>-</sup> ) | Simulation time (ns) |
|-------------|------------|----------|-----------------------------------------------|----------------------|
| NHC         | 244964     | 5        | 144/176                                       | 500                  |
| MPV         | 239698     | 5        | 139/171                                       | 500                  |
| NHC-SMD     | 238701     | 1        | 137/169                                       | 15                   |
| MPV-SMD     | 240259     | 1        | 139/171                                       | 15                   |

**Supplementary Table 4 | MD simulation system setup.**

---

| Lipid name                                       | % lipids within each leaflet |       |
|--------------------------------------------------|------------------------------|-------|
|                                                  | Outer                        | Inner |
| 1-palmitoyl-2-oleoyl-sn-phosphatidylcholine      | 45                           | 60    |
| N-stearoyl-D-erythro-sphingosylphosphorylcholine | 22                           | 10    |
| Cholesterol                                      | 33                           | 30    |

---

**Supplementary Table 5 | Lipid composition in MD simulations.**
